# Supplementary material
Source: PubMed Central journal article supplement (PMC5727572)
Supplement: NIHMS921566-supplement-Supplement1.pdf [file NIHMS921566-supplement-Supplement1.pdf]

## Supplementary Appendix

This appendix has been provided by the authors to give readers additional information about their work.

Supplement to: Xie YL, Chakravorty S, Armstrong DT, et al. Evaluation of a rapid molecular drug-susceptibility test for tuberculosis. *N Engl J Med* 2017;377:1043-54. DOI: [10.1056/NEJMoa1614915](https://doi.org/10.1056/NEJMoa1614915)

# Evaluation of a rapid molecular drug susceptibility test for tuberculosis

## SUPPLEMENTARY APPENDIX

### Table of Contents

**Appendix Table S1.** Study eligibility criteria

**Appendix Table S2.** Nucleic acid sequences of primers used for DNA sequencing

**Appendix Table S3.** *M. tuberculosis* mutations as determined by DNA sequencing, and their detection by the investigational assay (DST main analysis population), overall and by enrollment site

**Appendix Table S4.** Operational characteristics of the investigational assay (DST main analysis population)

**Appendix Table S5.** Sensitivity and specificity of the investigational assay compared against DNA sequencing as the reference standard, by genetic target (DST main analysis population)

**Appendix Table S6.** Characterization of isolates for which genotypic heteroresistance (mixed mutant/wild-type strains) was detected by DNA sequencing or by the investigational assay (DST main analysis population)

**Appendix Table S7A.** Sensitivity and specificity of the investigational assay compared against phenotypic drug susceptibility testing as the reference standard, by drug (reflex test analysis population)

**Appendix Table S7B.** Sensitivity and specificity of the investigational assay compared against DNA sequencing as the reference standard, by drug (reflex test analysis population)

**Appendix Table S7C.** Sensitivity and specificity of the investigational assay compared against DNA sequencing as the reference standard, by genetic target (reflex test analysis population)

**Appendix Table S8.** Sensitivity and specificity of the investigational assay, by sputum smear microscopy status (DST main analysis population)

**Appendix Table S9.** Sensitivity and specificity of the investigational assay, by enrollment site (DST main analysis population)

**Supplementary Results.** Detail of DNA sequencing genotypes of isolates with discrepant investigational assay and phenotypic DST results

**Table S1. Study eligibility criteria.**

| <b>Inclusion Criteria</b>                                                                                                                                                                                                                                                                                                                                                                                                                                                                                                                                                                                                                                   |
|-------------------------------------------------------------------------------------------------------------------------------------------------------------------------------------------------------------------------------------------------------------------------------------------------------------------------------------------------------------------------------------------------------------------------------------------------------------------------------------------------------------------------------------------------------------------------------------------------------------------------------------------------------------|
| Age $\geq$ 19 years (age of majority) if enrolled in South Korea; age $\geq$ 18 years (age of majority) if enrolled in China                                                                                                                                                                                                                                                                                                                                                                                                                                                                                                                                |
| Clinical signs and/or symptoms suggestive of pulmonary tuberculosis                                                                                                                                                                                                                                                                                                                                                                                                                                                                                                                                                                                         |
| Provision of informed consent                                                                                                                                                                                                                                                                                                                                                                                                                                                                                                                                                                                                                               |
| Meets one of the following criteria: <ul style="list-style-type: none"><li>A. Suspected or confirmed new pulmonary tuberculosis case who has received anti-tuberculosis drugs for less than 3 (three) days (target enrollment for Group A is approximately 50 participants). [case detection group]</li><li>B. Confirmed pulmonary tuberculosis with documented rifampin resistance, who has received anti-tuberculosis drugs for 31 days or less [drug resistance risk group]</li><li>C. History of prior tuberculosis PLUS ongoing signs and/or symptoms of pulmonary tuberculosis PLUS suspected drug resistance [drug resistance risk group].</li></ul> |
| <b>Exclusion Criterion</b>                                                                                                                                                                                                                                                                                                                                                                                                                                                                                                                                                                                                                                  |
| Inability to provide a sputum specimen                                                                                                                                                                                                                                                                                                                                                                                                                                                                                                                                                                                                                      |

Note: individuals were prospectively enrolled into either the case detection group or the drug resistance risk group. In the context of the known limitation of molecular tests that detect DNA to distinguish between viable and nonviable bacilli, prospective enrollment into a case detection group defined the set of participants in whom diagnostic accuracy of the investigational assay and the Xpert MTB/RIF assay for tuberculosis case detection was analyzed.

**Table S2. Nucleic acid sequences of primers used for DNA sequencing.**

| Target                  | PCR Primers<br>(5'-3')                         | Sequencing Primers<br>(5'-3')                            |
|-------------------------|------------------------------------------------|----------------------------------------------------------|
| <i>katG</i>             | GGTGCAGATGGGGCTGATCT<br>TACCAGGCCTTGGCGAACTC   | CAT GAA CGA CGT CGA AAC AG<br>CAA TTC CTC GGG GTG TTC CA |
| <i>inhA</i><br>promoter | CGACATACCTGCTGCGCAAT<br>TGCTCTTCTACCGCCGTGAA   | CCT CGC TGC CCA GAA AGG GA<br>ATC CCC CGG TTT CCT CCG GT |
| <i>gyrA</i>             | GACGCGAAAGTCGTTGTGAA<br>GGCCGTCGTAGTTAGGGATG   | CAG CTA CAT CGA CTA TGC GA<br>GGG CTT CGG TGT ACC TCA T  |
| <i>gyrB</i>             |                                                | CCA CCG ACA TCG GTG GAT T<br>CTG CCA CTT GAG TTT GTA CA  |
| <i>rrs</i>              | GGGTCAACTCGGAGGAAGGT<br>GTTGCCTCAGGACCCAACAG   | GGG CTT CAC ACA TGC TAC AA<br>ACA GAC AAG AAC CCC TCA CG |
| <i>eis</i><br>promoter  | GGACCGGTACTIONGCTCTGCA<br>ACCGTCAGCTCATGCAAGGT | CGT AAC GTC ACG GCG AAA T<br>ACC GCG ACG AAA CTG AGA C   |

**Table S3. *M. tuberculosis* mutations as determined by DNA sequencing, and their detection by the investigational assay, overall and by enrollment site (DST main analysis population)<sup>1</sup>**

| Mutation                               | Number of isolates in which the mutation was identified by sequencing, for the DST main analysis population overall and by enrollment site |                                         |                                      | n (% of overall with determinate assay results) identified as having mutant Tm(s) by investigational assay |
|----------------------------------------|--------------------------------------------------------------------------------------------------------------------------------------------|-----------------------------------------|--------------------------------------|------------------------------------------------------------------------------------------------------------|
|                                        | China<br>n (% of 210<br>enrollees)                                                                                                         | South Korea<br>n (% of 98<br>enrollees) | Overall<br>n (% of 308<br>enrollees) |                                                                                                            |
| <b><i>katG</i></b>                     |                                                                                                                                            |                                         |                                      |                                                                                                            |
| S315T                                  | 69 (32.9)                                                                                                                                  | 48 (49.0)                               | 117 (38.0)                           | 113/116 (97.4)                                                                                             |
| S315N                                  | 4 (1.9)                                                                                                                                    | 1 (1.0)                                 | 5 (1.6)                              | 5/5 (100)                                                                                                  |
| S315R                                  | 0 (0)                                                                                                                                      | 1 (1.0)                                 | 1 (0.3)                              | 1/1 (100)                                                                                                  |
| <b><i>inhA</i> promoter</b>            |                                                                                                                                            |                                         |                                      |                                                                                                            |
| T(-8)C                                 | 2 (1.0)                                                                                                                                    | 1 (1.0)                                 | 3 (1.0)                              | 3/3 (100)                                                                                                  |
| T(-8)A                                 | 1 (0.5)                                                                                                                                    | 0 (0)                                   | 1 (0.3)                              | 1/1 (100)                                                                                                  |
| C(-15)T                                | 21 (10.0)                                                                                                                                  | 9 (9.2)                                 | 30 (9.7)                             | 29/30 (96.7)                                                                                               |
| <b><i>gyrA</i><sup>2</sup></b>         |                                                                                                                                            |                                         |                                      |                                                                                                            |
| D94G                                   | 17 (8.1)                                                                                                                                   | 21 (21.4)                               | 38 (12.3)                            | 37/38 (97.4)                                                                                               |
| A90V                                   | 12 (5.7)                                                                                                                                   | 7 (7.1)                                 | 19 (6.2)                             | 18/19 (94.7)                                                                                               |
| D94A                                   | 5 (2.4)                                                                                                                                    | 3 (3.1)                                 | 8 (2.6)                              | 8/8 (100)                                                                                                  |
| D94N                                   | 3 (1.4)                                                                                                                                    | 4 (4.1)                                 | 7 (2.3)                              | 7/7 (100)                                                                                                  |
| D94Y                                   | 2 (1.0)                                                                                                                                    | 1 (1.0)                                 | 3 (1.0)                              | 3/3 (100)                                                                                                  |
| S91P                                   | 4                                                                                                                                          | 2 (2.0)                                 | 6 (1.9)                              | 6/6 (100)                                                                                                  |
| G88C                                   | 0 (0)                                                                                                                                      | 1 (1.0)                                 | 1 (0.3)                              | 1/1 (100)                                                                                                  |
| D94C (GAC/TGC) <sup>3</sup>            | 1 (0.5)                                                                                                                                    | 0 (0)                                   | 1 (0.3)                              | 0/1 (0)                                                                                                    |
| D94S (GAC/AGC) <sup>3</sup>            | 1 (0.5)                                                                                                                                    | 0 (0)                                   | 1 (0.3)                              | 1/1 (100)                                                                                                  |
| D94G and A90V                          | 0 (0)                                                                                                                                      | 1 (1.0)                                 | 1 (0.3)                              | 0/1 (0)                                                                                                    |
| D94Y and A90V                          | 1 (0.5)                                                                                                                                    | 0 (0)                                   | 1 (0.3)                              | 1/1 (100)                                                                                                  |
| D94N and A90V                          | 1 (0.5)                                                                                                                                    | 0 (0)                                   | 1 (0.3)                              | 1/1 (100)                                                                                                  |
| D94A and A90V                          | 0 (0)                                                                                                                                      | 1 (1.0)                                 | 1 (0.3)                              | 1/1 (100)                                                                                                  |
| S91P and A90V                          | 2 (1.0)                                                                                                                                    | 0 (0)                                   | 2 (0.6)                              | 2/2 (100)                                                                                                  |
| S91P and D94A                          | 0 (0)                                                                                                                                      | 1 (1.0)                                 | 1 (0.3)                              | 1/1 (100)                                                                                                  |
| D94Y and D94N                          | 1 (0.5)                                                                                                                                    | 0 (0)                                   | 1 (0.3)                              | 1/1 (100)                                                                                                  |
| <b><i>gyrB</i><sup>4</sup></b>         |                                                                                                                                            |                                         |                                      |                                                                                                            |
| D500H                                  | 0 (0)                                                                                                                                      | 1 (1.0)                                 | 1 (0.3)                              | 1/1 (100)                                                                                                  |
| D500N                                  | 0 (0)                                                                                                                                      | 2 (2.0)                                 | 2 (0.6)                              | 2/2 (100)                                                                                                  |
| D500G                                  | 0 (0)                                                                                                                                      | 1 (1.0)                                 | 1 (0.3)                              | 0/1 (0)                                                                                                    |
| N538T                                  | 0 (0)                                                                                                                                      | 1 (1.0)                                 | 1 (0.3)                              | 1/1 (100)                                                                                                  |
| E540A                                  | 0 (0)                                                                                                                                      | 1 (1.0)                                 | 1 (0.3)                              | 0/1 (0)                                                                                                    |
| E540D                                  | 1 (0.5)                                                                                                                                    | 0 (0)                                   | 1 (0.3)                              | 1/1 (100)                                                                                                  |
| <b><i>rrs</i><sup>5</sup></b>          |                                                                                                                                            |                                         |                                      |                                                                                                            |
| A1401G                                 | 18 (8.6)                                                                                                                                   | 15 (15.3)                               | 33 (10.7)                            | 30/31 (96.8)                                                                                               |
| <b><i>eis</i> promoter<sup>6</sup></b> |                                                                                                                                            |                                         |                                      |                                                                                                            |
| G(-10)A                                | 3 (1.4)                                                                                                                                    | 1 (1.0)                                 | 4 (1.3)                              | 3/4 (75.0)                                                                                                 |
| C(-14)T                                | 2 (1.0)                                                                                                                                    | 2 (2.0)                                 | 4 (1.3)                              | 3/4 (75.0)                                                                                                 |
| G(-37)T                                | 1 (0.5)                                                                                                                                    | 3 (3.1)                                 | 4 (1.3)                              | 3/3 (100)                                                                                                  |

Note: there are no known silent mutations that occur within the gene regions tested by the investigational assay for resistance. In our study, no silent mutations in these regions were detected either by the investigational assay or by sequencing.

**Table S4. Operational characteristics of the investigational assay (DST main analysis population, n=308)**

| Investigational assay result      | Number of participants | Interpretation of investigational assay result                                                                       | Phenotypic DST result                                                          | Sequencing result                       |
|-----------------------------------|------------------------|----------------------------------------------------------------------------------------------------------------------|--------------------------------------------------------------------------------|-----------------------------------------|
| 'Invalid'                         | 2 (0.6%)               | Assay failure. No signals obtained from assay internal control or <i>M. tuberculosis</i> gene targets                | INH-R, KAN-R, AMK-R (n=1)                                                      | <i>katG</i> S315T and <i>rrs</i> A1401G |
|                                   |                        |                                                                                                                      | No resistance to tested drugs (n=1)                                            | Wild-type at all tested loci            |
| 'MTB not detected'                | 2 (0.6%)               | Investigational assay did not detect <i>M. tuberculosis</i> , and therefore provided no information about resistance | No resistance to tested drugs                                                  | Wild-type at all tested loci            |
| Indeterminate <i>katG</i>         | 1 (0.3%)               | No information about isoniazid resistance                                                                            | INH-R                                                                          | Not done                                |
| Indeterminate <i>gyrA</i>         | 1 (0.3%)               | No information about fluoroquinolone resistance                                                                      | MXF 0.5-S, OFL-S                                                               | <i>gyrA</i> wild-type                   |
| Indeterminate <i>gyrB</i>         | 6 (1.9%)               | Fluoroquinolone-resistant based on detection of mutant Tm for <i>gyrA</i> (n=2)                                      | MXF 0.5-R, MXF 2.0-S, and OFL-R (n=1)<br>MXF 0.5-R, MXF 2.0-R, and OFL-R (n=1) | <i>gyrB</i> wild-type                   |
|                                   |                        | Fluoroquinolone-susceptible based on detection of wild-type Tm for <i>gyrA</i> (n=3)                                 | MXF 0.5-S, MXF 2.0-S, and OFL-S (n=3)                                          | <i>gyrB</i> wild-type                   |
|                                   |                        | No information about fluoroquinolone resistance based on indeterminate results for <i>gyrA</i> and <i>gyrB</i>       | MXF 0.5-S, MXF 2.0-S, and OFL-S (n=1)                                          | <i>gyrB</i> wild-type                   |
| Indeterminate <i>rrs</i>          | 6 (1.9%)               | No information about resistance to either KAN or AMK                                                                 | KAN-S and AMK-S (n=5)                                                          | <i>rrs</i> wild-type                    |
|                                   |                        |                                                                                                                      | KAN-R and AMK-R (n=1)                                                          | <i>rrs</i> A1401G                       |
| Indeterminate <i>eis</i> promoter | 4 (1.3%)               | KAN-S based on detection of wild-type Tm for <i>rrs</i>                                                              | KAN-S (n=2)                                                                    | <i>eis</i> wild-type                    |
|                                   |                        | KAN-S based on detection of wild-type Tm for <i>rrs</i>                                                              | KAN-R (n=1)                                                                    | <i>eis</i> G(-37)T                      |
|                                   |                        | No information about KAN resistance based on indeterminate results for <i>rrs</i> and <i>eis</i> promoter            | KAN-R (n=1)                                                                    | <i>eis</i> wild-type                    |

Abbreviations: INH, isoniazid; KAN, kanamycin; AMK, amikacin; OFL, ofloxacin; MXF, moxifloxacin; R, resistant; S, susceptible

**Table S5. Sensitivity and specificity of the investigational assay compared against DNA sequencing as the reference standard, by genetic target (DST main analysis population)<sup>1</sup>**

| Genetic target                   | DNA Seq               | Mutation<br>(# with heteroresistance detected by sequencing) | No mutation | Sensitivity %<br>(95% CI)<br>n/n | Specificity %<br>(95% CI)<br>n/n |
|----------------------------------|-----------------------|--------------------------------------------------------------|-------------|----------------------------------|----------------------------------|
|                                  | Investigational Assay |                                                              |             |                                  |                                  |
| <i>katG</i> <sup>2</sup>         | Mutation              | 119 (0)                                                      | 0           | 97.5<br>(93.0-99.5)<br>119/122   | 100<br>(98.0-100)<br>181/181     |
|                                  | No mutation           | 3 (2)                                                        | 181         |                                  |                                  |
| <i>inhA</i> promoter             | Mutation              | 33 (1)                                                       | 0           | 97.1<br>(84.7-99.9)<br>33/34     | 100<br>(98.6-100)<br>270/270     |
|                                  | No mutation           | 1 (1)                                                        | 270         |                                  |                                  |
| <i>gyrA</i> <sup>3</sup>         | Mutation              | 88 (10)                                                      | 0           | 95.7<br>(89.2-98.8)<br>88/92     | 100<br>(98.3-100)<br>211/211     |
|                                  | No mutation           | 4 (4)                                                        | 211         |                                  |                                  |
| <i>gyrB</i> <sup>4</sup>         | Mutation              | 5 (1)                                                        | 2           | 71.4<br>(29.0-96.3)<br>5/7       | 99.3<br>(97.4-99.9)<br>289/291   |
|                                  | No mutation           | 2 (2)                                                        | 289         |                                  |                                  |
| <i>rrs</i> <sup>5</sup>          | Mutation              | 30 (4)                                                       | 0           | 96.8<br>(83.3-99.9)<br>30/31     | 100<br>(98.6-100)<br>267/267     |
|                                  | No mutation           | 1 (0)                                                        | 267         |                                  |                                  |
| <i>eis</i> promoter <sup>6</sup> | Mutation              | 9 (0)                                                        | 1           | 81.8<br>(48.2-97.7)<br>9/11      | 99.7<br>(98.1-100.0)<br>288/289  |
|                                  | No mutation           | 2 (1)                                                        | 288         |                                  |                                  |

Notes

<sup>1</sup> there are no known silent mutations that occur within the gene regions tested by the investigational assay for resistance. In our study, no silent mutations in these regions were detected either by the investigational assay or by sequencing.

<sup>2</sup> one specimen excluded due to indeterminate investigational assay result for *katG*

<sup>3</sup> one specimen excluded due to indeterminate investigational assay result for *gyrA*

<sup>4</sup> six specimens excluded due to indeterminate investigational assay result for *gyrB*

<sup>5</sup> six specimens excluded due to indeterminate investigational assay result for *rrs*

<sup>6</sup> four specimens excluded due to indeterminate investigational assay result for *eis* promoter

**Table S6. Characterization of *M. tuberculosis* populations for which heteroresistance was detected by DNA sequencing and/or the investigational assay (DST main analysis population)**

| Target      | DNA Sequencing |                   | Investigational assay result | Investigational assay & sequencing performed from same sputum (S1)? |
|-------------|----------------|-------------------|------------------------------|---------------------------------------------------------------------|
|             | Mutation       | Sequencing result |                              |                                                                     |
| <i>katG</i> | S315T          | HR                | Wild-type                    | Yes                                                                 |
| <i>katG</i> | S315T          | HR                | Wild-type                    | Yes                                                                 |
| <i>inhA</i> | C(-15)T        | HR                | HR                           | Yes                                                                 |
| <i>inhA</i> | C(-15)T        | resistant         | HR                           | Yes                                                                 |
| <i>inhA</i> | C(-15)T        | HR                | Wild-type                    | Yes                                                                 |
| <i>gyrA</i> | A90V           | resistant         | HR                           | Yes                                                                 |
| <i>gyrA</i> | A90V           | HR                | HR                           | Yes                                                                 |
| <i>gyrA</i> | A90V           | HR                | Wild-type                    | No                                                                  |
| <i>gyrA</i> | D94G           | resistant         | HR                           | Yes                                                                 |
| <i>gyrA</i> | D94G           | HR                | HR                           | Yes                                                                 |
| <i>gyrA</i> | D94G           | HR                | HR                           | No                                                                  |
| <i>gyrA</i> | D94G           | HR                | Wild-type                    | Yes                                                                 |
| <i>gyrA</i> | D94A           | HR                | resistant                    | Yes                                                                 |
| <i>gyrA</i> | D94N           | HR                | HR                           | Yes                                                                 |
| <i>gyrA</i> | D94S (GAC/AGC) | HR                | HR                           | Yes                                                                 |
| <i>gyrA</i> | D94C (GAC/TGC) | HR                | Wild-type                    | Yes                                                                 |
| <i>gyrA</i> | A90V; D94A     | HR                | HR                           | No                                                                  |
| <i>gyrA</i> | A90V; S91P     | HR                | HR                           | Yes                                                                 |
| <i>gyrA</i> | A90V; D94N     | HR                | resistant                    | Yes                                                                 |
| <i>gyrA</i> | A90V; D94Y     | HR                | resistant                    | Yes                                                                 |
| <i>gyrA</i> | A90V; D94G     | HR                | Wild-type                    | No                                                                  |
| <i>gyrB</i> | E540A          | HR                | Wild-type                    | No                                                                  |
| <i>gyrB</i> | D500G          | HR                | Wild-type                    | Yes                                                                 |
| <i>gyrB</i> | E540D          | HR                | resistant                    | Yes                                                                 |
| <i>rrs</i>  | A1401G         | HR                | resistant                    | Yes                                                                 |
| <i>rrs</i>  | A1401G         | HR                | HR                           | Yes                                                                 |
| <i>rrs</i>  | A1401G         | HR                | HR                           | Yes                                                                 |
| <i>rrs</i>  | A1401G         | HR                | HR                           | Yes                                                                 |
| <i>eis</i>  | C(-14)T        | HR                | Wild-type                    | Yes                                                                 |

Abbreviation: HR, heteroresistant



**Table S7A. Sensitivity and specificity of the investigational assay compared against phenotypic drug susceptibility testing as the reference standard, by drug (reflex test analysis population)<sup>1</sup>**

| Drug                                     | MGIT DST              | Resistant | Susceptible | Sensitivity %<br>(95% CI)<br>n/n | Specificity %<br>(95% CI)<br>n/n |
|------------------------------------------|-----------------------|-----------|-------------|----------------------------------|----------------------------------|
|                                          | Investigational Assay |           |             |                                  |                                  |
| Isoniazid <sup>2</sup>                   | Resistant             | 125       | 1           | 86.2<br>(79.5-91.4)<br>125/145   | 88.9<br>(51.8-99.7)<br>8/9       |
|                                          | Susceptible           | 20        | 8           |                                  |                                  |
| ofloxacin <sup>3</sup>                   | Resistant             | 77        | 7           | 92.8<br>(84.9-97.3)<br>77/83     | 90.1<br>(80.7-95.9)<br>64/71     |
|                                          | Susceptible           | 6         | 64          |                                  |                                  |
| moxifloxacin<br>0.5 µg/mL <sup>3,4</sup> | Resistant             | 72        | 11          | 90.0<br>(81.2-95.6)<br>72/80     | 84.9<br>(74.6-92.2)<br>62/73     |
|                                          | Susceptible           | 8         | 62          |                                  |                                  |
| moxifloxacin<br>2.0 µg/mL <sup>3</sup>   | Resistant             | 47        | 37          | 97.9<br>(88.9-100)<br>47/48      | 65.1<br>(55.2-74.1)<br>69/106    |
|                                          | Susceptible           | 1         | 69          |                                  |                                  |
| kanamycin <sup>5</sup>                   | Resistant             | 35        | 4           | 81.4<br>(66.6-91.6)<br>35/43     | 96.4<br>(91.0-99.0)<br>106/110   |
|                                          | Susceptible           | 8         | 106         |                                  |                                  |
| amikacin <sup>5</sup>                    | Resistant             | 29        | 1           | 76.3<br>(59.8-88.6)<br>29/38     | 99.1<br>(95.3-100)<br>114/115    |
|                                          | Susceptible           | 9         | 114         |                                  |                                  |

Notes

<sup>1</sup> one specimen excluded due to invalid investigational assay result

<sup>2</sup> one specimen excluded due to indeterminate investigational assay result for *katG*

<sup>3</sup> one specimen excluded due to indeterminate investigational assay result for *gyrA*

<sup>4</sup> one specimen excluded due to indeterminate moxifloxacin phenotypic DST result

<sup>5</sup> two specimens excluded due to indeterminate investigational assay result for *rrs*

**Table S7B. Sensitivity and specificity of the investigational assay compared against DNA sequencing as the reference standard, by drug (reflex test analysis population)<sup>1</sup>**

| Drug                           | DNA Seq               | Mutation | No mutation | Sensitivity %<br>(95% CI)<br>n/n | Specificity %<br>(95% CI)<br>n/n |
|--------------------------------|-----------------------|----------|-------------|----------------------------------|----------------------------------|
|                                | Investigational Assay |          |             |                                  |                                  |
| isoniazid <sup>2</sup>         | Mutation              | 126      | 0           | 98.4<br>(94.5-99.8)<br>126/128   | 100<br>(86.8-100)<br>26/26       |
|                                | No mutation           | 2        | 26          |                                  |                                  |
| fluoro-quinolones <sup>3</sup> | Mutation              | 84       | 0           | 98.8<br>(93.6-100)<br>84/85      | 100<br>(94.8-100)<br>69/69       |
|                                | No mutation           | 1        | 69          |                                  |                                  |
| kanamycin <sup>4</sup>         | Mutation              | 38       | 1           | 95.0<br>(83.1-99.4)<br>38/40     | 99.1<br>(95.2-100)<br>112/113    |
|                                | No mutation           | 2        | 112         |                                  |                                  |
| amikacin <sup>4</sup>          | Mutation              | 30       | 0           | 100<br>(88.4-100)<br>30/30       | 100<br>(97.1-100)<br>123/123     |
|                                | No mutation           | 0        | 123         |                                  |                                  |

Notes

<sup>1</sup> one specimen excluded due to invalid investigational assay result

<sup>2</sup> one specimen excluded due to indeterminate investigational assay result for *katG*

<sup>3</sup> one specimen excluded due to indeterminate investigational assay result for *gyrA*

<sup>4</sup> two specimens excluded due to indeterminate investigational assay result for *rrs*

**Table S7C. Sensitivity and specificity of the investigational assay compared against DNA sequencing as the reference standard, by genetic target (Reflex test analysis population)<sup>1</sup>**

| Genetic target                   | DNA Seq               |  | Mutation (# with heteroresistance detected by sequencing) | No mutation | Sensitivity % (95% CI) n/n | Specificity % (95% CI) n/n |
|----------------------------------|-----------------------|--|-----------------------------------------------------------|-------------|----------------------------|----------------------------|
|                                  | Investigational Assay |  |                                                           |             |                            |                            |
| <i>katG</i> <sup>2</sup>         | Mutation              |  | 101 (0)                                                   | 0           | 98.1 (93.1-99.8) 101/103   | 100 (93.0-100) 51/51       |
|                                  | No mutation           |  | 2 (1)                                                     | 51          |                            |                            |
| <i>inhA</i> promoter             | Mutation              |  | 26 (0)                                                    | 0           | 96.3 (81.0-99.9) 26/27     | 100 (97.2-100) 128/128     |
|                                  | No mutation           |  | 1 (1)                                                     | 128         |                            |                            |
| <i>gyrA</i> <sup>3</sup>         | Mutation              |  | 81 (10)                                                   | 0           | 98.8 (93.4-100) 81/82      | 100 (95.0-100) 72/72       |
|                                  | No mutation           |  | 1 (1)                                                     | 72          |                            |                            |
| <i>gyrB</i> <sup>4</sup>         | Mutation              |  | 4 (1)                                                     | 2           | 66.7 (22.2-95.7) 4/6       | 98.6 (95.1-99.8) 144/146   |
|                                  | No mutation           |  | 2 (2)                                                     | 144         |                            |                            |
| <i>rrs</i> <sup>5</sup>          | Mutation              |  | 30 (4)                                                    | 0           | 100 (88.4-100) 30/30       | 100 (97.1-100) 123/123     |
|                                  | No mutation           |  | 0                                                         | 123         |                            |                            |
| <i>eis</i> promoter <sup>5</sup> | Mutation              |  | 9 (0)                                                     | 1           | 81.8 (48.2-97.7) 9/11      | 99.3 (96.1-100) 141/142    |
|                                  | No mutation           |  | 2 (1)                                                     | 141         |                            |                            |

Notes

<sup>1</sup> one specimen excluded due to invalid investigational assay result

<sup>2</sup> one specimen excluded due to indeterminate investigational assay result for *katG*

<sup>3</sup> one specimen excluded due to indeterminate investigational assay result for *gyrA*

<sup>4</sup> three specimens excluded due to indeterminate investigational assay result for *gyrB*

<sup>5</sup> two specimens excluded due to indeterminate investigational assay result for *rrs*

<sup>6</sup> two specimens excluded due to indeterminate investigational assay result for *eis* promoter

**Table S8. Sensitivity and specificity of the investigational assay, by sputum smear microscopy status (DST main analysis population)**

|                                 | Phenotypic DST |                |                     |                     |                |                | DNA Sequencing |               |                |               |
|---------------------------------|----------------|----------------|---------------------|---------------------|----------------|----------------|----------------|---------------|----------------|---------------|
|                                 | INH            | OFL            | MXF<br>0.5<br>µg/mL | MXF<br>2.0<br>µg/mL | KAN            | AMK            | INH            | MXF/<br>OFL   | KAN            | AMK           |
| <b>Smear-negative specimens</b> |                |                |                     |                     |                |                |                |               |                |               |
| Sensitivity                     |                |                |                     |                     |                |                |                |               |                |               |
| no./total (%)                   | 17/20 (85.0)   | 14/15 (93.3)   | 12/13 (92.3)        | 6/7 (85.7)          | 3/5 (60.0)     | 2/3 (66.7)     | 18/18 (100)    | 14/14 (100)   | 4/4 (100)      | 2/2 (100)     |
| 95% CI                          | 62.1-96.8      | 68.1-99.8      | 63.9-99.8           | 42.1-99.6           | 14.7-94.7      | 9.4-99.2       | 81.5-100       | 76.8-100      | 39.8-100       | 15.8-100      |
| Specificity                     |                |                |                     |                     |                |                |                |               |                |               |
| no./total (%)                   | 17/18 (94.4)   | 23/23 (100)    | 23/25 (92.0)        | 23/31 (74.2)        | 29/30 (96.7)   | 32/32 (100)    | 20/20 (100)    | 24/24 (100)   | 31/31 (100)    | 33/33 (100)   |
| 95% CI                          | 72.7-99.9      | 85.2-100       | 74.0-99.0           | 55.4-88.1           | 82.8-99.9      | 89.1-100       | 83.2-100       | 85.8-100      | 88.8-100       | 89.4-100      |
| <b>Smear-positive specimens</b> |                |                |                     |                     |                |                |                |               |                |               |
| Sensitivity                     |                |                |                     |                     |                |                |                |               |                |               |
| no./total (%)                   | 133/160 (83.1) | 70/80 (87.5)   | 76/86 (88.4)        | 45/46 (97.8)        | 32/44 (72.7)   | 27/38 (71.1)   | 133/136 (97.8) | 77/81 (95.1)  | 34/37 (91.9)   | 28/29 (96.6)  |
| 95% CI                          | 76.4-88.6      | 78.2-93.8      | 79.7-94.3           | 88.5-100            | 57.2-85.0      | 54.1-84.6      | 93.7-99.5      | 87.8-98.6     | 78.1-98.3      | 82.2-99.9     |
| Specificity                     |                |                |                     |                     |                |                |                |               |                |               |
| no./total (%)                   | 105/105 (100)  | 178/185 (96.2) | 177/187 (94.7)      | 187/219 (85.4)      | 216/219 (98.6) | 224/225 (99.6) | 129/129 (100)  | 184/184 (100) | 225/226 (99.6) | 234/234 (100) |
| 95% CI                          | 96.6-100       | 92.4-98.5      | 90.4-97.4           | 80.0-89.8           | 96.1-99.7      | 97.6-100       | 97.2-100       | 98.0-100      | 97.6-100       | 98.4-100      |
| <b>Total</b>                    |                |                |                     |                     |                |                |                |               |                |               |
| Sensitivity                     |                |                |                     |                     |                |                |                |               |                |               |
| no./total (%)                   | 150/180 (83.3) | 84/95 (88.4)   | 78/89 (87.6)        | 51/53 (96.2)        | 35/49 (71.4)   | 29/41 (70.7)   | 151/154 (98.1) | 91/95 (95.8)  | 38/41 (92.7)   | 30/31 (96.8)  |
| 95% CI                          | 77.1-88.5      | 80.2-94.1      | 79.0-93.7           | 87.0-99.5           | 56.7-83.4      | 54.5-83.9      | 94.4-99.6      | 89.6-98.8     | 80.1-98.5      | 83.3-99.9     |
| Specificity                     |                |                |                     |                     |                |                |                |               |                |               |
| no./total (%)                   | 122/123 (99.2) | 201/208 (96.6) | 200/212 (94.3)      | 210/250 (84.0)      | 245/249 (98.4) | 256/257 (99.6) | 149/149 (100)  | 208/208 (100) | 256/257 (99.6) | 267/267 (100) |
| 95% CI                          | 95.6-100       | 93.2-98.6      | 90.3-97.0           | 78.9-88.3           | 95.9-99.6      | 97.9-99.9      | 97.6-100       | 98.2-100      | 97.9-100       | 98.6-100      |

Abbreviations: DST, drug susceptibility testing; INH, isoniazid; OFL, ofloxacin; MXF, moxifloxacin; KAN, kanamycin; AMK, amikacin; CI, confidence interval

**Table S9. Sensitivity and Specificity of the investigational assay, by enrollment site (DST main analysis population)**

| Site                                          | Phenotypic DST                 |                                |                                |                                |                                |                                | DNA Sequencing                 |                              |                                |                              |
|-----------------------------------------------|--------------------------------|--------------------------------|--------------------------------|--------------------------------|--------------------------------|--------------------------------|--------------------------------|------------------------------|--------------------------------|------------------------------|
|                                               | INH                            | OFL                            | MXF<br>0.5<br>µg/mL            | MXF<br>2.0<br>µg/mL            | KAN                            | AMK                            | INH                            | MXF/<br>OFL                  | KAN                            | AMK                          |
| <b>China</b>                                  |                                |                                |                                |                                |                                |                                |                                |                              |                                |                              |
| Sensitivity<br>no./total<br>(%)<br>95% CI [%] | 90/109<br>(82.6)<br>74.1-89.2  | 43/52<br>(82.7)<br>69.7-91.8   | 42/50<br>(84.0)<br>70.9-92.8   | 24/26<br>(92.3)<br>74.9-99.1   | 18/27<br>(66.7)<br>46.0-83.5   | 16/22<br>(72.7)<br>49.8-89.3   | 91/93<br>(97.8)<br>92.4-99.7   | 48/51<br>(94.1)<br>83.8-98.8 | 20/21<br>(95.2)<br>76.2-99.9   | 17/17<br>(100)<br>80.5-100   |
| Specificity<br>no./total<br>(%)<br>95% CI [%] | 101/102<br>(99.0)<br>94.7-100  | 155/160<br>(96.9)<br>92.9-99.0 | 155/160<br>(96.9)<br>92.9-99.0 | 162/186<br>(87.1)<br>81.4-91.6 | 178/181<br>(98.3)<br>95.2-99.7 | 185/186<br>(99.5)<br>97.0-100  | 118/118<br>(100)<br>96.9-100   | 161/161<br>(100)<br>97.7-100 | 186/187<br>(99.5)<br>97.1-100  | 191/191<br>(100)<br>98.1-100 |
| <b>South Korea</b>                            |                                |                                |                                |                                |                                |                                |                                |                              |                                |                              |
| Sensitivity<br>no./total<br>(%)<br>95% CI [%] | 60/71<br>(84.5)<br>74.0-92.0   | 41/43<br>(95.4)<br>84.2-99.4   | 36/39<br>(92.3)<br>79.1-98.4   | 27/27<br>(100)<br>87.2-100     | 17/22<br>(77.3)<br>54.6-92.2   | 13/19<br>(68.4)<br>43.5-87.4   | 60/61<br>(98.4)<br>91.2-100    | 43/44<br>(97.7)<br>88.0-99.9 | 18/20<br>(90.0)<br>68.3-98.8   | 13/14<br>(92.9)<br>66.1-99.8 |
| Specificity<br>no./total<br>(%)<br>95% CI [%] | 21/21<br>(100)<br>83.9-100     | 46/48<br>(95.8)<br>85.8-99.5   | 45/52<br>(86.5)<br>74.2-94.4   | 48/64<br>(75.0)<br>62.6-85.0   | 67/68<br>(98.5)<br>92.1-100    | 71/71<br>(100)<br>94.9-100     | 31/31<br>(100)<br>88.8-100     | 47/47<br>(100)<br>92.5-100   | 70/70<br>(100)<br>94.9-100     | 76/76<br>(100)<br>95.3-100   |
| <b>Total</b>                                  |                                |                                |                                |                                |                                |                                |                                |                              |                                |                              |
| Sensitivity<br>no./total<br>(%)<br>95% CI [%] | 150/180<br>(83.3)<br>77.1-88.5 | 84/95<br>(88.4)<br>80.2-94.1   | 78/89<br>(87.6)<br>79.0-93.7   | 51/53<br>(96.2)<br>87.0-99.5   | 35/49<br>(71.4)<br>56.7-83.4   | 29/41<br>(70.7)<br>54.5-83.9   | 151/154<br>(98.1)<br>94.4-99.6 | 91/95<br>(95.8)<br>89.6-98.8 | 38/41<br>(92.7)<br>80.1-98.5   | 30/31<br>(96.8)<br>83.3-99.9 |
| Specificity<br>no./total<br>(%)<br>95% CI [%] | 122/123<br>(99.2)<br>95.6-100  | 201/208<br>(96.6)<br>93.2-98.6 | 200/212<br>(94.3)<br>90.3-97.0 | 210/250<br>(84.0)<br>78.9-88.3 | 245/249<br>(98.4)<br>95.9-99.6 | 256/257<br>(99.6)<br>97.9-99.9 | 149/149<br>(100)<br>97.6-100   | 208/208<br>(100)<br>98.2-100 | 256/257<br>(99.6)<br>97.9-99.9 | 267/267<br>(100)<br>98.6-100 |

Abbreviations: DST, drug susceptibility testing; INH, isoniazid; OFL, ofloxacin; MXF, moxifloxacin; KAN, kanamycin; AMK, amikacin; CI, confidence interval

## Supplementary Results. Detail of DNA sequencing genotypes of isolates with discrepant investigational assay and phenotypic DST results

**A.** Sequencing results for specimens found resistant by phenotypic testing and susceptible by the investigational assay (Figure 2A):

isoniazid: *katG* S315T (n=1); *katG* S315/wild-type mix (n=1)  
moxifloxacin (0.5 µg/mL): *gyrA* A90V/wild-type mix (n=1); *gyrA* A90V+D94G/wild-type mix(n=1);  
*gyrA* D94C/wild-type mix (n=1)  
moxifloxacin (2.0 µg/mL): *gyrA* D94C/wild-type mix (n=1)  
ofloxacin: *gyrA* A90V/ wild-type mix (n=1); *gyrA* A90V+D94G/wild-type mix (n=1); *gyrA* D94G/wild-type mix (n=1); *gyrA* D94C/wild-type mix (n=1)  
kanamycin: *rrs* A1401G (n=1); *eis* G(-10)A (n=1); *eis* G(-37)T (n=1)  
amikacin: *rrs* A1401G (n=1)

**B.** Sequencing results for specimens found susceptible by phenotypic testing and resistant by the investigational assay (Figure 2B):

isoniazid: *katG* S315T (n=1)  
moxifloxacin (0.5 µg/mL): *gyrA* A90V (n=7); *gyrA* A90V/wild-type mix (n=1); *gyrA* S91P (n=3); *gyrB* D500H (n=1)  
moxifloxacin (2.0 µg/mL): *gyrA* A90V (n=15); *gyrA* S91P (n=5); *gyrA* D94G (n=5); *gyrA* D94A (n=5), *gyrA* D94N (n=1); *gyrA* D94Y (n=2), *gyrA* D94N+D94Y (n=1); *gyrA* A90V/wild-type mix (n=1); *gyrA* A90V+D94N/wild-type mix (n=1); *gyrA* D94A/wild-type mix (n=1); *gyrB* D500N (n=2); *gyrB* E540D wild-type mix (n=1)  
ofloxacin: *gyrA* A90V (n=5); *gyrA* A90V/wild-type mix (n=1); *gyrB* E540D/wild-type mix (n=1)  
kanamycin: *eis* G(-10)A (n=1); *rrs* A1401G (n=1); *rrs* A1401G/wild-type mix (n=1)  
amikacin: *rrs* A1401G/wild-type mix (n=1)
